# Supplementary material
Source: Research Square preprint supplement (doi:10.21203/rs.3.rs-9211583/v1)
Supplement: Supplementary file 1 [file 5bde928465d756c95daefeb8.pdf]

# 1 Peatland mapping

Mapping of peatland was conducted. All the peatland in Etelä Savo region is represented in Figure 1 with all currently harvested peatlands in blue and peatlands over 100 hectares as magenta. Green areas denote the municipalities of Joroinen and Heinävesi, which were removed from Etelä Savo in 2021. Peatlands above 100 hectares for each municipality was taken and Figure 2, 3, 4, 5.

All the peatlands above 100 hectares are represented in Figure 1.

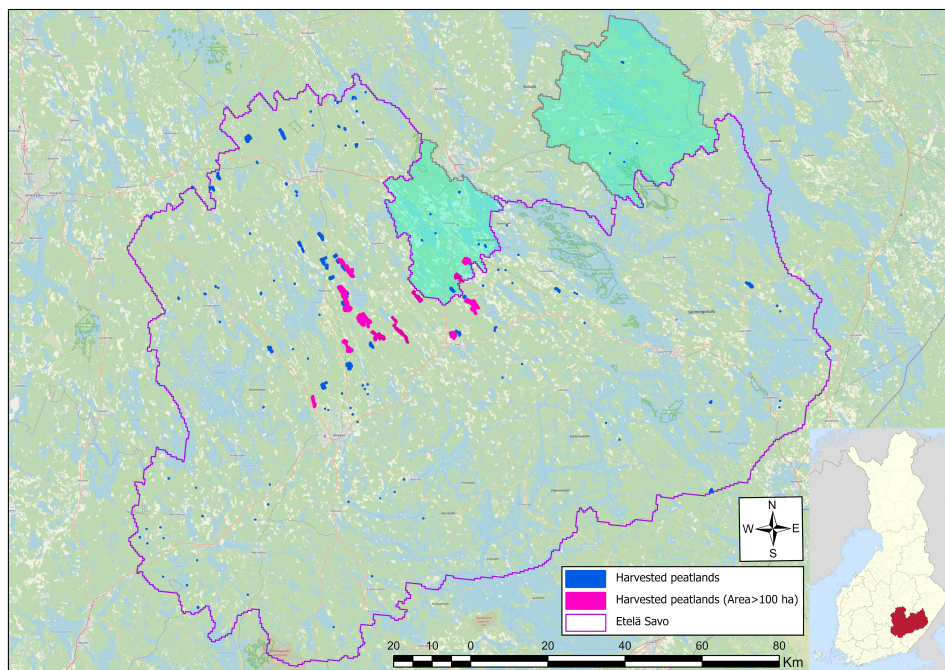

Figure 1: Peatlands in Etelä Savo

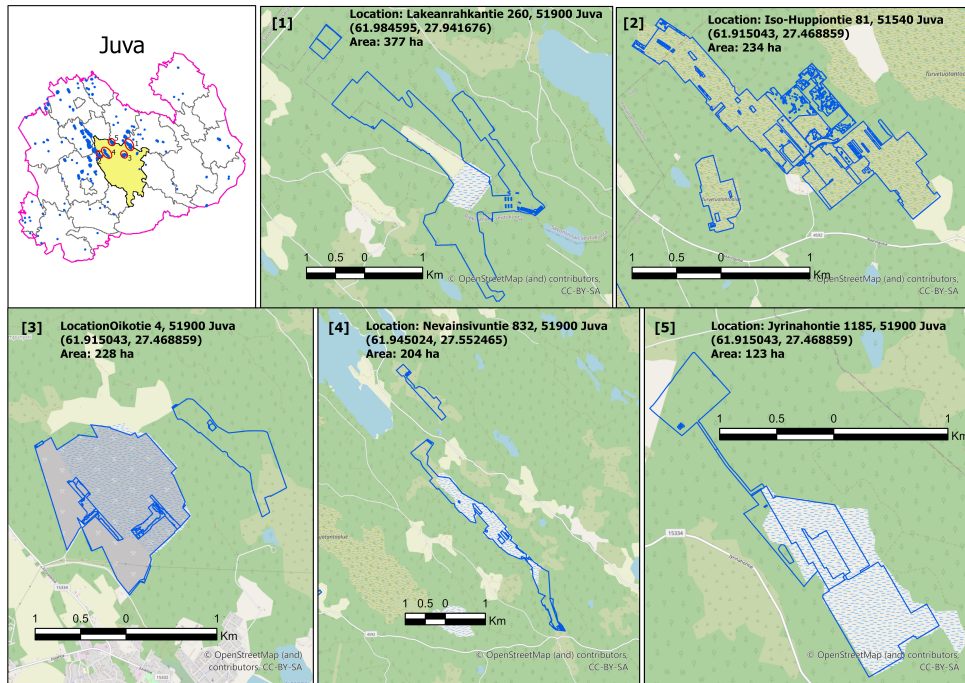

Figure 2: Peatlands above 100 ha in Juva

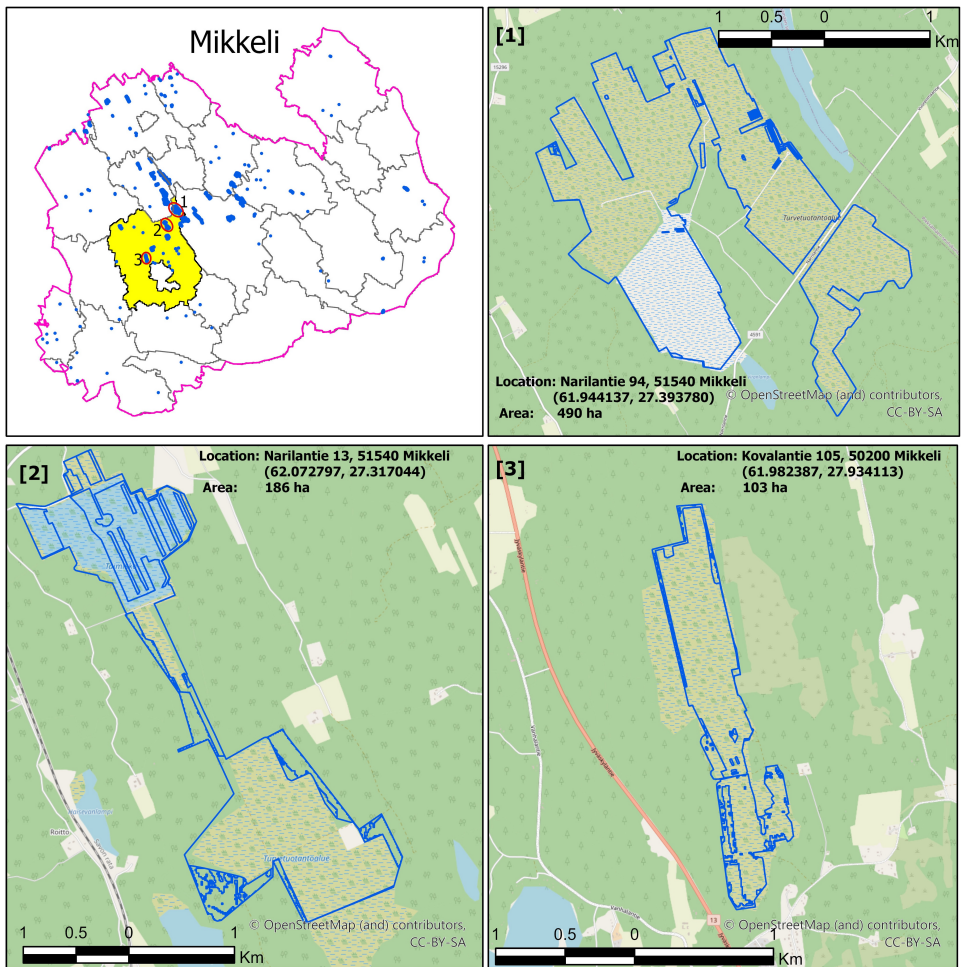

Figure 3: Peatlands above 100 ha in Mikkeli

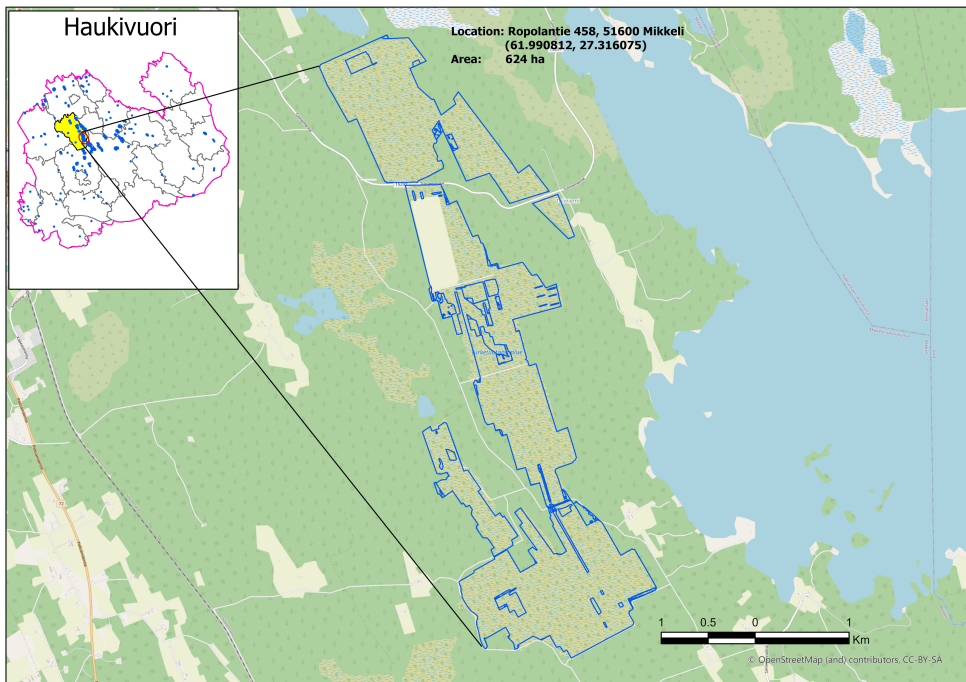

Figure 4: Peatlands above 100 ha in Haukivuori

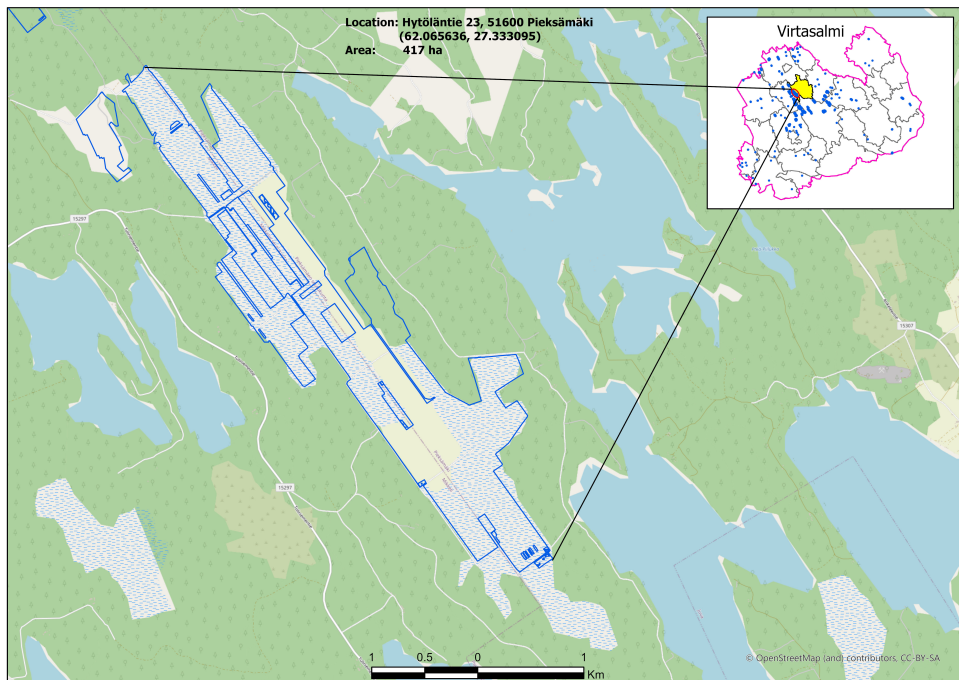

Figure 5: Peatlands above 100 ha in Pieksämäki

## 2 Affects of halting peat

Table 1: Peat contribution to the economy, yearly (Valonen et al., 2021)

| Location   | Gross Value (k€) | Processing Value (k€) | Work-years | Locations |
|------------|------------------|-----------------------|------------|-----------|
| South Savo | 11 028           | 1 800                 | 29         | 11        |
| Mikkeli    | 10 380           | 1 513                 | 24         | 7         |
| Pieksamäki | 648              | 286                   | 5          | 4         |

Table 2: Factors for GWP

|                  |     |
|------------------|-----|
| CO <sub>2</sub>  | 1   |
| CH <sub>4</sub>  | 27  |
| N <sub>2</sub> O | 273 |

## 3 Scenarios

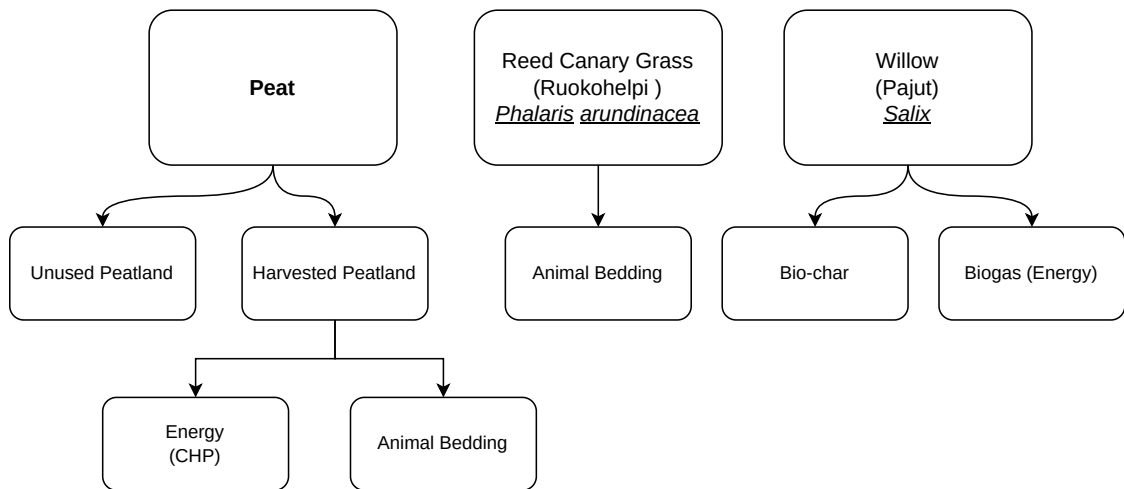

Figure 6: System boundaries and end product scenarios considered in the study

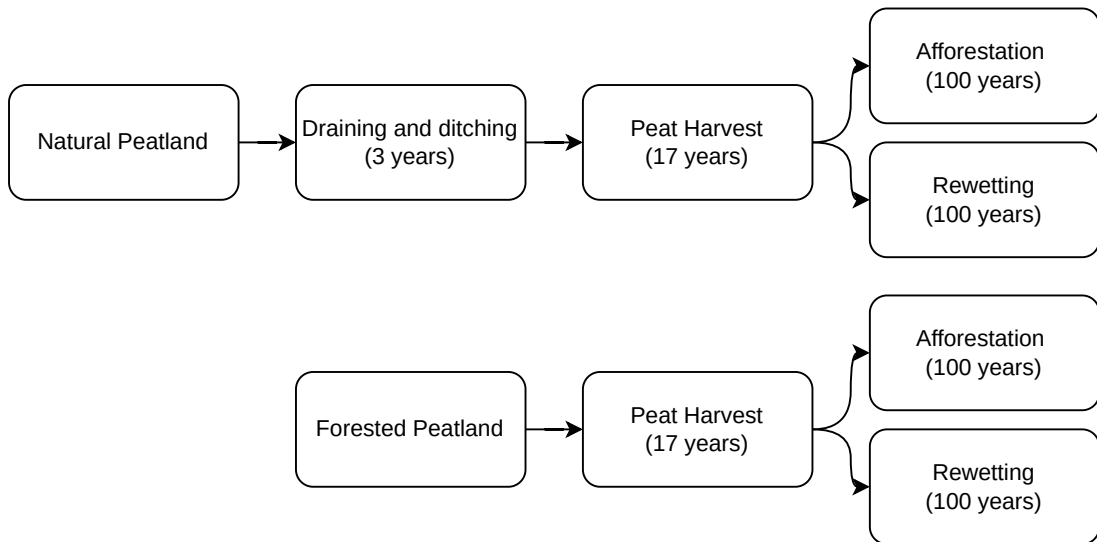

Figure 7: Peat harvest timelines

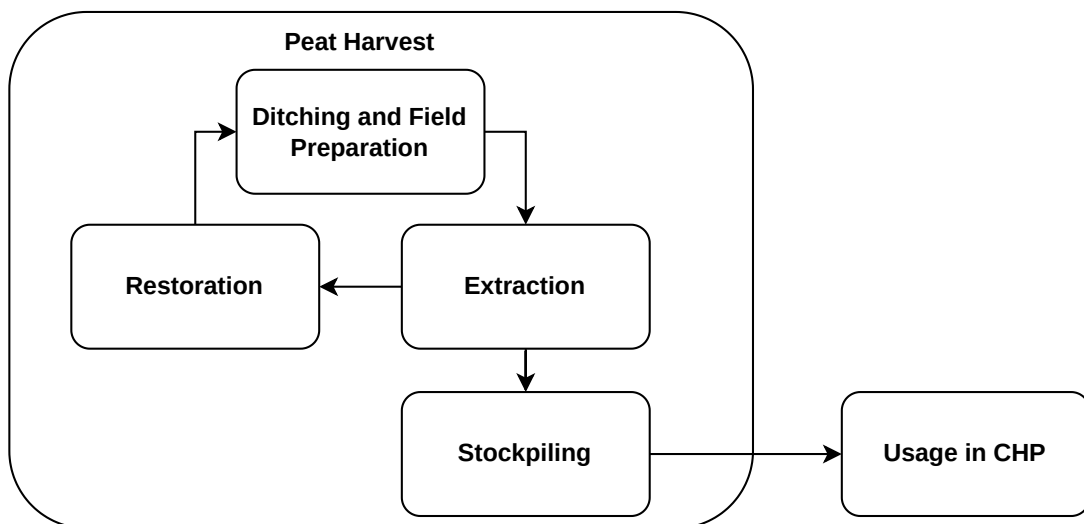

Figure 8: System boundary for peat as energy

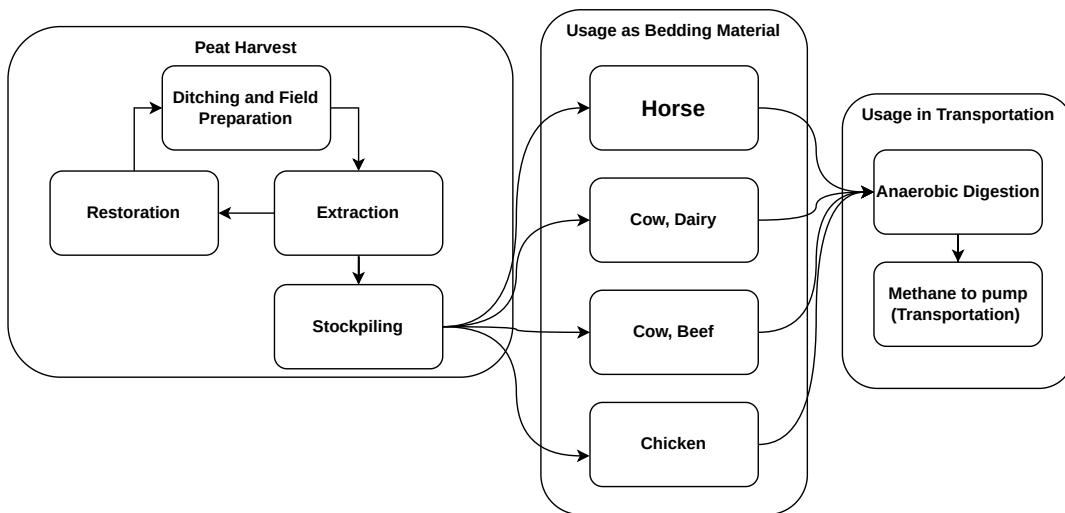

Figure 9: Processes and system boundary in peat as animal bedding material

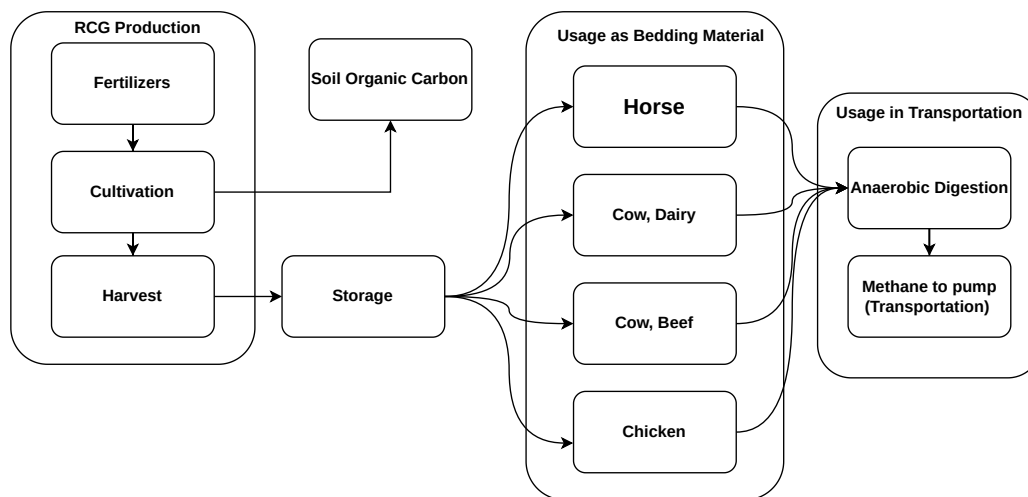

Figure 10: Processes and system boundary in reed canary grass harvest and usage as animal bedding material

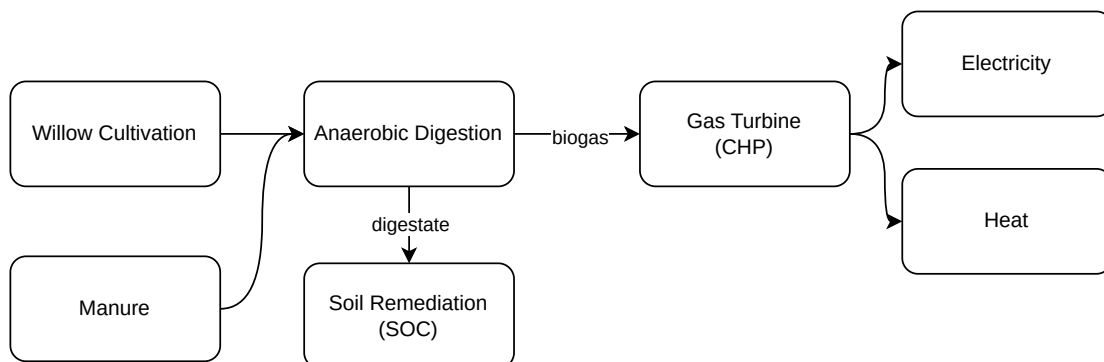

Figure 11: Processes and system boundary in willow usage in energy

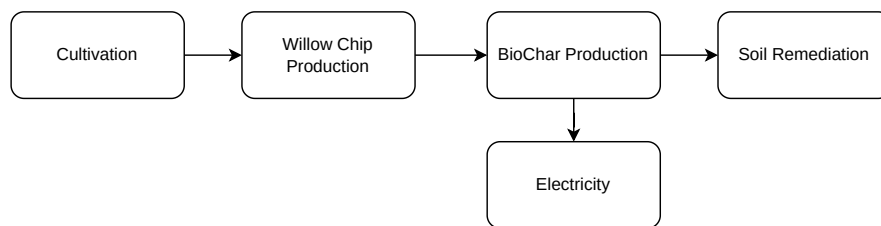

Figure 12: Processes and system boundary Willow usage for biochar

## 4 Peat

Table 3: Properties of Peat

| Source                                 | VTT  | Ekono | Vapo |
|----------------------------------------|------|-------|------|
| Moisture,w-%                           | 48.5 | 47.1  | 45.9 |
| Density as received, kg/m <sup>3</sup> |      | 330   | 313  |
| Net calorific value as received, MJ/kg | 9.6  | 9.9   | 9.8  |

Table 4: Yearly fuel prices, peat in electricity production.

| Year | eur/MWh | €/tonnes | €/m <sup>3</sup> | €/ha |
|------|---------|----------|------------------|------|
| 2022 | 12.75   | 37.19    | 13.02            | 5100 |
| 2023 | 15.5    | 45.21    | 15.82            | 6200 |
| 2024 | 17.0    | 49.58    | 17.35            | 6800 |
| 2025 | 17.0    | 49.58    | 17.35            | 6800 |

Table 5: Years taken for each phase of peat lifecycle

|                                 | Ditching | Production | Restoration | Total |
|---------------------------------|----------|------------|-------------|-------|
| Nat-extraction-Afforestation    | 3        | 17         | 100         | 120   |
| Nat-extraction-Rewetting        | 3        | 17         | 100         | 120   |
| Forest-extraction-Afforestation | 0        | 17         | 100         | 117   |
| Forest-extraction-Rewetting     | 0        | 17         | 100         | 117   |

\* Mälkki and Frilander, 1997

GWP calculation of peat in Table 4 includes average 84km of transportation with a diesel powered truck with a load capacity of 44 Tons.

From Mälkki and Frilander (1997), peat harvested is 300–1000 m<sup>3</sup> per hectare per year. Best case scenario of 1000 m<sup>3</sup> per hectare was assumed. Moisture content of 50% was assumed.

From, Table 5, only 17 out of the whole life cycle is harvested. Adjusted value was calculated by taking this into account

Pellervon taloustutkimus (PTT) modelled the regional economic impacts of halting the use of energy peat. The national impacts were adequate. However, the most significant relative impacts were identified in South-Ostrobothnia. Halting the use also impacts North-Ostrobothnia and Central Finland where peat is extracted. The overall decrease in labour would be 1260 person-work years considering complete value chain of peat. (Valonen et al., 2021)

Table 6: Peat LCA

| Process        | GWP <sub>100</sub> [gCO <sub>2</sub> eq./MJ] |
|----------------|----------------------------------------------|
| Peatland       | -42.2                                        |
| Production     | 14.4                                         |
| Transportation | 0.3                                          |
| Combustion     | 107.5                                        |
| Afforestation  | -7.4                                         |

Table 7: GWP calculation of peat lifecycle

|             | CH <sub>4</sub> *<br>[g] | CO <sub>2</sub> *<br>[kg] | N <sub>2</sub> O*<br>[g] | GWP/MWh<br>[gCO <sub>2</sub> e] | GWP/m <sup>2</sup> /yr<br>[kgCO <sub>2</sub> e] | GWP/m <sup>2</sup> /yr <sub>adjusted</sub><br>[kgCO <sub>2</sub> e] |
|-------------|--------------------------|---------------------------|--------------------------|---------------------------------|-------------------------------------------------|---------------------------------------------------------------------|
| Nat-ext-Aff | -790                     | 400                       | 16                       | 383038                          | 3.40                                            | 23.97                                                               |
| Nat-ext-Rew | -380                     | 420                       | 16                       | 414108                          | 3.67                                            | 25.91                                                               |
| For-ext-Aff | -770                     | 400                       | 16                       | 383578                          | 3.49                                            | 24.00                                                               |
| For-ext-Rew | -370                     | 420                       | 16                       | 414378                          | 3.77                                            | 25.93                                                               |

\* Mälkki and Frilander, 1997

Table 8: GWP of peat, yearly

|           |                  | GWP/m <sup>2</sup><br>kgCO <sub>2</sub> e | GWP/ha<br>tCO <sub>2</sub> e | WEI/m <sup>2</sup><br>€ | WEI/ha<br>€ |
|-----------|------------------|-------------------------------------------|------------------------------|-------------------------|-------------|
| Harvested | Nat-ext-Aff      | 23.97                                     | 239.70                       | -1.25                   | -12,464.32  |
|           | Nat-ext-Rew      | 25.91                                     | 259.14                       | -1.35                   | -13,475.35  |
|           | For-ext-Aff      | 24.00                                     | 240.04                       | -1.25                   | -12,481.89  |
|           | For-ext-Rew      | 25.93                                     | 259.31                       | -1.35                   | -13,484.14  |
| Unused    | Natural Peatland | 0.12                                      | 1.18                         | -0.01                   | -61.48      |
|           | Drained Forest   | 0.67                                      | 6.66                         | -0.03                   | -346.09     |





Table 11: Scenario summary: Reed Canary Grass

|                  | Rainfed                   |           |          |          |          | Irrigated |           |           |          |           |           |           |
|------------------|---------------------------|-----------|----------|----------|----------|-----------|-----------|-----------|----------|-----------|-----------|-----------|
|                  | Horse                     | Cow,dairy | Cow,beef | Chicken  | Horse    | Cow,dairy | Cow,beef  | Chicken   | Horse    | Cow,dairy | Cow,beef  | Chicken   |
| v min            |                           |           |          | 450.00   |          |           |           | 450.00    |          |           |           | 450.00    |
| v max            |                           |           |          | 560.00   |          |           |           | 560.00    |          |           |           | 560.00    |
| GWP/ha/yr        |                           |           |          | 2.38     |          |           |           | 2.38      |          |           |           | 4.30      |
| WEI/ha/yr        |                           |           |          | -4.06    |          |           |           | -4.06     |          |           |           | -3.95     |
| GWP/ha/yr (wSOC) |                           |           |          | -123.64  |          |           |           | -123.64   |          |           |           | -223.60   |
| WEI(wSOC)        |                           |           |          | -1.68    |          |           |           | -1.68     |          |           |           | 0.35      |
| GEI              |                           |           |          | 87.27    |          |           |           | 87.27     |          |           |           | -18.34    |
| GEI (wSOC)       |                           |           |          | 326.36   |          |           |           | 326.36    |          |           |           | 226.40    |
|                  |                           |           |          | 537.27   |          |           |           | 537.27    |          |           |           | 431.66    |
| Methane VA       |                           |           |          |          |          |           |           |           |          |           |           |           |
|                  | €/m <sup>3</sup>          |           |          |          |          |           |           |           |          |           |           |           |
|                  | m <sup>3</sup> /ha        |           |          |          |          |           |           |           |          |           |           |           |
| GWP_methane      | kgCO <sub>2</sub> e/ha/yr | 6,292.13  | 8,999.21 | 8,999.21 | 7,731.03 | 8,727.80  | 12,482.78 | 12,482.78 | 8,727.80 | 12,482.78 | 12,482.78 | 10,723.69 |
| WEI_methane      | tCO <sub>2</sub> e/ha/yr  | 314.61    | 449.96   | 449.96   | 386.55   | 436.39    | 624.14    | 624.14    | 436.39   | 624.14    | 624.14    | 536.18    |
| GEI_methane      | €/ha/yr                   | 0.3146    | 0.4500   | 0.4500   | 0.3866   | 0.4364    | 0.6241    | 0.6241    | 0.4364   | 0.6241    | 0.6241    | 0.5362    |
| GEI_total        | €/ha/yr                   | -16.36    | -23.40   | -23.40   | -20.10   | -22.69    | -32.46    | -32.46    | -22.69   | -32.46    | -32.46    | -27.88    |
| GEI_total (wSOC) | tCO <sub>2</sub> e/yr/ha  | 10,051    | 14,375   | 14,375   | 12,350   | 13,942    | 19,940    | 19,940    | 13,942   | 19,940    | 19,940    | 17,130    |
|                  | WEI/ha/yr                 | 10,377    | 14,702   | 14,702   | 12,676   | 14,168    | 20,166    | 20,166    | 14,168   | 20,166    | 20,166    | 17,356    |
|                  |                           | 10,915    | 15,239   | 15,239   | 13,213   | 14,373    | 20,372    | 20,372    | 14,373   | 20,372    | 20,372    | 17,562    |

Table 12: Scenario summary: Peat usage in energy

|                    |             |            |
|--------------------|-------------|------------|
| Price <sup>a</sup> | €/Mwh       | 17         |
| Yield              | Mwh/ha/yr   | 359.7      |
| Value Added.       | €/ha/yr     | 6115.07    |
| GWP <sup>b</sup>   | tCO2e/ha/yr | 137,769    |
| WEI                | €/ha/yr     | -7,163,984 |
| GEI                | €/ha/yr     | -7,157,869 |

<sup>a</sup> Energy peat price 2025 (stat.fi)

<sup>b</sup> Combustion of peat only (Grönroos et al., 2013)

## 5 Reed Canary Grass

Table 13: GWP of RCG production

|            |                        |                     | Rainfed | Irrigated |
|------------|------------------------|---------------------|---------|-----------|
| Value      | v min                  | €/ha                | 450     | 450       |
|            | v max                  | €/ha                | 560     | 560       |
| Production | GWP/m <sup>2</sup> /yr | kgCO <sub>2</sub> e | 0.24    | 0.43      |
|            | GWP/ha/yr              | tCO <sub>2</sub> e  | 2.38    | 4.3       |
|            | WEI/ha/yr              | €                   | -123.64 | -223.6    |
| SOC        | GWP/m <sup>2</sup> /yr | kgCO <sub>2</sub> e | -0.41   | -0.39     |
|            | GWP/ha/yr              | tCO <sub>2</sub> e  | -4.06   | -3.95     |
|            | WEI/ha/yr              | €                   | 210.91  | 205.26    |

Jordan et al., 2023

Calculation of GWP of RCG in Table 4 excludes 50km of transportation using a diesel truck with a payload of 44 Tons with a GWP of 0.07 kgCO<sub>2</sub>e per 1000 km. The value of 0.000826 kgCO<sub>2</sub>e per square meter of farmed land.

### 5.1 Usage as bedding material

Table 14: Peat land required for animal bedding, per year

|                                | unit                   | Horse | Cow, dairy | Cow, beef | Chicken  |
|--------------------------------|------------------------|-------|------------|-----------|----------|
| yearly bedding required        | m <sup>3</sup> /animal | 18    | 4          | 5.9       | 0.007    |
| peatland required per year     | m <sup>2</sup>         | 360   | 80         | 118       | 0.14     |
| bedding waste output           | t                      | 9.288 | 2.952      | 4.3542    | 0.004438 |
| bedding waste per ha           | t/ha                   | 258   | 369        | 369       | 317      |
| bio-methane per ha of peatland | m <sup>3</sup> ha      | 12.9  | 18.45      | 18.45     | 15.85    |

Lehtoranta et al., 2021; Laine, 2024

Table 15: RCG required for usage as bedding material, per year

|                               | unit                   | Horse    | Cow,dairy | Cow,beef  | Chicken   |
|-------------------------------|------------------------|----------|-----------|-----------|-----------|
| yearly bedding required       | m <sup>3</sup> /animal | 104      | 107       | 89        | 1         |
| bedding waste                 | t                      | 53.664   | 78.966    | 65.682    | 0.634     |
| land required (rainfed RCG)   | m <sup>2</sup> /animal | 7,675.87 | 7,897.29  | 6,568.77  | 73.81     |
| bedding waste per ha          | t/ha                   | 69.91    | 99.99     | 99.99     | 85.90     |
| biomethane per ha             | m <sup>3</sup> /ha     | 6,292.13 | 8,999.21  | 8,999.21  | 7,731.03  |
| land required (irrigated RCG) | m <sup>2</sup> /animal | 5,533.77 | 5,693.40  | 4,735.63  | 53.21     |
| bedding waste per ha          | t/ha                   | 96.98    | 138.70    | 138.70    | 119.15    |
| biomethane per ha             | m <sup>3</sup> /ha     | 8,727.80 | 12,482.78 | 12,482.78 | 10,723.69 |

- 97% bio-methane per hectare of farmland obtained from anaerobic digestion of bedding material waste
- Allocation used to bio-methane from AD from bedding material waste. Waste consists of animal manure and bedding material

## 6 Willow

VA of willow biofuel in energy (Alberici, Gräf, and Magali, 2023) VA of willow biochar from (Puro.earth, 2021)

Table 16: Economic and environmental impacts of willow to bigoas

|                                |                          |        |
|--------------------------------|--------------------------|--------|
| v.a.min/MWh <sup>a</sup>       | €/MWh                    | 84     |
| v.a.max/MWh                    | €/MWh                    | 175    |
| energy                         | Mwh/ha/yr                | 0.43   |
| v.a.min                        | €/ha                     | 36.10  |
| v.a.max                        | €/ha                     | 75.20  |
| GWP100(w/o sinks) <sup>b</sup> | tCO <sub>2</sub> e/ha/yr | 184    |
| GWP100(including sinks)        | tCO <sub>2</sub> e/ha/yr | -367   |
| WEI (w/o sinks)                | €/ha/yr                  | -9,568 |
| WEI(including sinks)           | €/ha/yr                  | 19,084 |
| GEI min w/o sinks              | €/ha/yr                  | -9,532 |
| GEI max w/o sinks              | €/ha/yr                  | -9,493 |
| GEI min with sinks             | €/ha/yr                  | 19,120 |
| GEI max with sinks             | €/ha/yr                  | 19,159 |

<sup>a</sup> Calculated using values from Alberici, Gräf, and Magali, 2023

<sup>b</sup> Calculated from Ericsson et al., 2014

Table 17: Economic and environmental impacts of willow as biochar

|                                      |              |             |
|--------------------------------------|--------------|-------------|
| Price <sup>a</sup>                   | €/t drymass  | 270         |
| Willow yield <sup>b</sup>            | t drymass/ha | 6           |
| Value added                          | €/ha         | 1,620       |
| GWP <sup>c</sup>                     | ton/ha/yr    | 7,440       |
| GWP (including offsets) <sup>c</sup> | ton/ha/yr    | -6,600      |
| WEI                                  | €/ha/yr      | -386,880    |
| WEI(including offsets)               | €/ha/yr      | 343,200     |
| GEI (w/o offsets)                    | €/ha/yr      | -385,260.00 |
| GEI (with offsets)                   | €/ha/yr      | 344,820.00  |

<sup>a</sup> From Puro.earth, 2021

<sup>b</sup> Yield when grown in peatland (Leppäkoski et al., 2021; Laasasenaho et al., 2017)

<sup>c</sup> Calculated using values from Forsström, 2019

## 7 Summary Comparison

Table 18: Comparison of all alternatives, yearly

|                 | GWP_min               | GWP_max               | WEI_min     | WEI_max        | GEI_min       | GEI_max        |
|-----------------|-----------------------|-----------------------|-------------|----------------|---------------|----------------|
|                 | tCO <sub>2</sub> e/ha | tCO <sub>2</sub> e/ha | €/ha        | €/ha           | €/ha          | €/ha           |
| Peat (unused)   | 1.18                  | 6.66                  | -61         | -346           | -61           | -346           |
| Peat (bedding)  | 239.70                | 259.14                | -13,484     | -12,464        | -411          | 2,579          |
| Peat (energy)   | 138,009               | 138,028               | -7.18E+06   | -7.18E+06      | -7.18E+06     | -7.18E+06      |
| RCG (bedding)   | -3.75                 | 4.30                  | <b>-255</b> | 71             | <b>10,377</b> | 20,372         |
| Willow(biochar) | 7,440                 | <b>-6,600</b>         | -386,880    | <b>343,200</b> | -386,070      | <b>344,010</b> |
| Willow(energy)  | <b>-6</b>             | 9.56                  | -9,532      | 19,120         | -9,512        | 19,140         |

Table 19: Yearly Yields in Etelä Savo, all harvested peatlands

|                 | GWP_min             | GWP_max             | WEI_min   | WEI_max  | GEI_min    | GEI_max    |
|-----------------|---------------------|---------------------|-----------|----------|------------|------------|
|                 | ktCO <sub>2</sub> e | ktCO <sub>2</sub> e | M€        | M€       | M€         | M€         |
| Peat (unused)   | 4.77                | 27                  | -0.25     | -1.40    | -0.25      | -1.40      |
| Peat (bedding)  | 966.95              | 1,045               | -54.40    | -50.28   | -1.66      | 10.41      |
| Peat (energy)   | 966.94              | 1,046               | 556.73    | 556.81   | -28,953.91 | -28,953.90 |
| RCG             | -15.11              | 17                  | -1.03     | 0.28     | 41.86      | 82.18      |
| Willow(biochar) | 30,012.96           | -26,624             | -1,560.67 | 1,384.47 | -1,557.41  | 1,387.74   |
| Willow(energy)  | -24.20              | 39                  | -38.45    | 77.13    | -38.37     | 77.21      |

Table 20: Yearly Yields in Etelä Savo, > 15 ha

|                 | GWP_min             | GWP_max             | WEI_min   | WEI_max  | GEI_min    | GEI_max    |
|-----------------|---------------------|---------------------|-----------|----------|------------|------------|
|                 | ktCO <sub>2</sub> e | ktCO <sub>2</sub> e | M€        | M€       | M€         | M€         |
| Peat (unused)   | 4.15                | 23                  | -0.22     | -1.22    | -0.22      | -1.22      |
| Peat (bedding)  | 841.59              | 910                 | -47.34    | -43.76   | -1.44      | 9.06       |
| Peat (energy)   | 841.58              | 910                 | 484.55    | 484.62   | -25,200.09 | -25,200.09 |
| RCG             | -13.15              | 15                  | -0.90     | 0.25     | 36.44      | 71.52      |
| Willow(biochar) | 26,121.84           | -23,173             | -1,358.34 | 1,204.98 | -1,355.49  | 1,207.82   |
| Willow(energy)  | -21.07              | 34                  | -33.47    | 67.13    | -33.40     | 67.20      |

Table 21: Yearly Yields in Etelä Savo &gt; 100 ha

|                  | GWP_min             | GWP_max             | WEI_min      | WEI_max         | GEI_min      | GEI_max         |
|------------------|---------------------|---------------------|--------------|-----------------|--------------|-----------------|
|                  | ktCO <sub>2</sub> e | ktCO <sub>2</sub> e | M€           | M€              | M€           | M€              |
| Peat (unused)    | 3.53                | 20                  | -0.18        | -1.03           | -0.18        | -1.03           |
| Peat (bedding)   | 715.75              | 774                 | -40.26       | -37.22          | -1.23        | 7.70            |
| Peat (energy)    | 715.74              | 774                 | 412.09       | 412.15          | -21,431.92   | -21,431.92      |
| RCG              | -11.18              | 13                  | <b>-0.76</b> | 0.21            | <b>30.99</b> | 60.83           |
| Willow (biochar) | 22,215.84           | <b>-19,708</b>      | -1,155.22    | <b>1,024.80</b> | -1,152.81    | <b>1,027.21</b> |
| Willow (energy)  | <b>-17.92</b>       | 29                  | -28.46       | 57.09           | -28.40       | 57.15           |

Table 22: Annual GWP in Etelä Savo from peatlands > 100 ha [ktCO<sub>2</sub>e/yr]

|                 |     | Juva      | Mikkeli   | Haukivuori | Pieksamäki | Total      |
|-----------------|-----|-----------|-----------|------------|------------|------------|
| Peat (unused)   | Min | 1.38      | 0.92      | 0.74       | 0.49       | 3.53       |
|                 | Max | 7.76      | 5.18      | 4.15       | 2.78       | 19.87      |
| Peat (bedding)  | Min | 279.49    | 186.73    | 149.57     | 99.96      | 715.75     |
|                 | Max | 302.16    | 201.87    | 161.70     | 108.06     | 773.79     |
| Peat (energy)   | Min | 279.49    | 186.73    | 149.57     | 99.95      | 715.74     |
|                 | Max | 302.36    | 202.00    | 161.81     | 108.13     | 774.30     |
| RCG (bedding)   | Min | -4.37     | -2.92     | -2.34      | -1.56      | -11.18     |
|                 | Max | 5.01      | 3.35      | 2.68       | 1.79       | 12.84      |
| Willow(biochar) | Min | 8,675.04  | 5,795.76  | 4,642.56   | 3,102.48   | 22,215.84  |
|                 | Max | -7,695.60 | -5,141.40 | -4,118.40  | -2,752.20  | -19,707.60 |
| Willow(energy)  | Min | -7.00     | -4.67     | -3.74      | -2.50      | -17.92     |
|                 | Max | 11.15     | 7.45      | 5.97       | 3.99       | 28.55      |

Table 23: Annual WEI in Etelä Savo from peatlands &gt; 100 ha [M€/yr]

|                 |     | Juva    | Mikkeli | Haukivuori | Pieksamäki | Total     |
|-----------------|-----|---------|---------|------------|------------|-----------|
| Peat (unused)   | Min | -0.07   | -0.05   | -0.04      | -0.03      | -0.20     |
|                 | Max | -0.40   | -0.27   | -0.22      | -0.14      | -1.15     |
| Peat (bedding)  | Min | -15.72  | -10.50  | -8.41      | -5.62      | -44.77    |
|                 | Max | -14.53  | -9.71   | -7.78      | -5.20      | -41.38    |
| Peat (energy)   | Min | 160.92  | 107.51  | 86.12      | 57.55      | 458.19    |
|                 | Max | 160.94  | 107.52  | 86.13      | 57.56      | 458.25    |
| RCG (bedding)   | Min | -0.30   | -0.20   | -0.16      | -0.11      | -0.85     |
|                 | Max | 0.08    | 0.06    | 0.04       | 0.03       | 0.23      |
| Willow(biochar) | Min | -451.10 | -301.38 | -241.41    | -161.33    | -1,284.44 |
|                 | Max | -451.10 | -301.38 | -241.41    | -161.33    | -1,284.44 |
| Willow(energy)  | Min | -11.11  | -7.43   | -5.95      | -3.97      | -31.65    |
|                 | Max | 22.29   | 14.89   | 11.93      | 7.97       | 63.48     |

Table 24: Annual GEI in Etelä Savo from peatlands 100 ha [M€/yr]

|                 |     | Juva      | Mikkeli   | Haukivuori | Pieksamäki | Total      |
|-----------------|-----|-----------|-----------|------------|------------|------------|
| Peat (unused)   | Min | -0.07     | -0.05     | -0.04      | -0.03      | -0.20      |
|                 | Max | -0.40     | -0.27     | -0.22      | -0.14      | -1.15      |
| Peat (bedding)  | Min | -0.48     | -0.32     | -0.26      | -0.17      | -1.36      |
|                 | Max | 3.01      | 2.01      | 1.61       | 1.08       | 8.56       |
| Peat (energy)   | Min | -8,368.93 | -5,591.25 | -4,478.74  | -2,993.00  | -23,829.20 |
|                 | Max | -8,368.93 | -5,591.25 | -4,478.74  | -2,993.00  | -23,829.19 |
| RCG (bedding)   | Min | 12.10     | 8.08      | 6.48       | 4.33       | 34.45      |
|                 | Max | 23.75     | 15.87     | 12.71      | 8.49       | 67.63      |
| Willow(biochar) | Min | -450.16   | -300.75   | -240.91    | -160.99    | -1,281.75  |
|                 | Max | 401.12    | 267.98    | 214.66     | 143.45     | 1,142.11   |
| Willow(energy)  | Min | -11.09    | -7.41     | -5.94      | -3.97      | -31.58     |
|                 | Max | 22.32     | 14.91     | 11.94      | 7.98       | 63.54      |

## References

- Alberici, Sacha, David Gräf, and Aurand Magali (2023). *Beyond energy – monetising biomethane’s whole-system benefits*. European Biogas Association. URL: [https://www.europeanbiogas.eu/wp-content/uploads/2023/02/20230213\\_Guidehouse\\_EBA\\_Report-1.pdf](https://www.europeanbiogas.eu/wp-content/uploads/2023/02/20230213_Guidehouse_EBA_Report-1.pdf).
- Ericsson, Niclas et al. (Nov. 2014). “Climate impact and energy efficiency from electricity generation through anaerobic digestion or direct combustion of short rotation coppice willow”. In: *Applied Energy* 132, pp. 86–98. ISSN: 0306-2619. DOI: 10.1016/j.apenergy.2014.06.049. URL: <http://dx.doi.org/10.1016/j.apenergy.2014.06.049>.
- Forsström, Elias (2019). “Global warming potential of willow biochar as carbon sink in Finland”. MA thesis. Lappeenranta-Lahti University of Technology. URL: <https://urn.fi/URN:NBN:fi-fe2019110436567>.
- Grönroos, Juha et al. (2013). “Life-cycle climate impacts of peat fuel: calculation methods and methodological challenges”. In: *The International journal of life cycle assessment* 18.3, pp. 567–576.
- Jordan, Cristina-Maria et al. (Jan. 2023). “Energy potentials, negative emissions, and spatially explicit environmental impacts of perennial grasses on abandoned cropland in Europe”. In: *Environmental Impact Assessment Review* 98, p. 106942. ISSN: 0195-9255. DOI: 10.1016/j.eiar.2022.106942. URL: <http://dx.doi.org/10.1016/j.eiar.2022.106942>.
- Laasasenaho, Kari et al. (Dec. 2017). “Landowners’ willingness to promote bioenergy production on wasteland - future impact on land use of cutaway peatlands”. In: *Land Use Policy* 69, pp. 167–175. ISSN: 0264-8377. DOI: 10.1016/j.landusepol.2017.09.010. URL: <http://dx.doi.org/10.1016/j.landusepol.2017.09.010>.
- Laine, Christine (2024). “Carbon abatement opportunities in agriculture sector : the use of carbon handprint for sustainable animal bedding material”. MA thesis. Lappeenranta-Lahti University of Technology. URL: <https://urn.fi/URN:NBN:fi-fe2024120298436>.
- Lehtoranta, Suvi et al. (2021). *Turvetta korvaavien kuivikemateriaalien ilmastovaikutukset*. ISBN: 978-952-11-5454-6.
- Leppäkoski, Lauri et al. (Sept. 2021). “Assessing the Carbon Footprint of Biochar from Willow Grown on Marginal Lands in Finland”. In: *Sustainability* 13.18, p. 10097. ISSN: 2071-1050. DOI: 10.3390/su131810097. URL: <http://dx.doi.org/10.3390/su131810097>.
- Mälkki, Helena and Pertti Frilander (1997). *Life cycle assessment of peat utilisation in Finland*. Technical Research Centre of Finland (VTT). ISBN: 951-38-5211-3.
- Puro.earth (2021). *Biochar - Finland Price*. Accessed: 2026-01-27. URL: <https://puro.earth/documents/content/DMPnSxYqSe6gtTg1QmlzYgo17da>.
- Valonen, Matti et al. (2021). *Turvetoimialan aluetalousvaikutukset*. Vol. 204. ISBN: 978-952-224-230-3.
